# Supplementary material for: Carbon recycling efficiency and phosphate turnover by marine nitrifying archaea
Source: PubMed Central journal article supplement — Sci Adv. 2020 May 8;6(19):eaba1799. doi: 10.1126/sciadv.aba1799 (PMC7209981; doi:10.1126/sciadv.aba1799), 2020-05-08
Supplement: aba1799_SM.pdf [file aba1799_SM.pdf]

## Supplementary Materials for

### **Carbon recycling efficiency and phosphate turnover by marine nitrifying archaea**

Travis B. Meador\*, Niels Schoffelen, Timothy G. Ferdelman, Osmond Rebello, Alexander Khachikyan, Martin Könneke

\*Corresponding author. Email: [travis.meador@bc.cas.cz](mailto:travis.meador@bc.cas.cz)

Published 8 May 2020, *Sci. Adv.* **6**, eaba1799 (2020)

DOI: [10.1126/sciadv.aba1799](https://doi.org/10.1126/sciadv.aba1799)

#### **This PDF file includes:**

Text S1  
Scheme S1  
Figs. S1 to S5  
Tables S1 to S3

## Supplementary Material

### Text S1. Calculation of global ocean C and P fluxes by Thaumarchaeota.

Our global chemoautotrophy flux estimates are modeled after the depth regimes, ocean zonation, and calculation performed by (2) but now apply a higher estimate of the C yield from nitrification (0.32 or 0.22 for P-replete or -deplete conditions, respectively; Fig. 3), as opposed to a value of 0.1 assumed previously, after (8, 9). Briefly, fluxes of organic C respiration (31, 38) are converted to N by dividing by 6.6, according to the Redfield ratio. For example, the upper range of thaumarchaeal C-fixation in the dark ocean is calculated using the higher C-flux estimate (38):  $(330 \text{ Tmol N y}^{-1}; \text{Wutcher et al.}) \times 0.30 (C_o/N_n) \times 12 \text{ g C mol}^{-1} = 1188 \text{ Tg C y}^{-1}$ . The entirety of this reduced N is assumed to be available for nitrification in the deep ocean; however, in the euphotic zone, nitrifiers competing with phytoplankton access only a portion of reduced N. We assume a conservative estimate of 43% of reduced N is available for nitrification in the euphotic zone (2, 12), which was determined based on the relationship between specific nitrification rate and the ratio of “new” versus “regenerated” production in the surface ocean. Open ocean fluxes of C and P in the euphotic zone reported in the current study are further adjusted for the lower C yield expected in regions of the ocean characterized by P-limitation (Fig. S5); that is the N. Atlantic Subtropical Gyre and Equatorial Atlantic, which account for 13% of the surface area of the world’s oceans (13, 31). An annual global dark C-fixation flux of 0.6-1.1 Pg C y<sup>-1</sup> was also extrapolated by combining volumetric DIC fixation rates reported by (32) for the subsurface oxygen minimum zone (~100-500 m; 40-100 μmol C m<sup>-3</sup> d<sup>-1</sup>), intermediate waters (~500-2000 m; 0.1 μmol C m<sup>-3</sup> d<sup>-1</sup>), and deep waters (> 2000 m; 0.05 μmol C m<sup>-3</sup> d<sup>-1</sup>) with volumetric estimates of (43) for these regions (2, 20, and 1080 × 10<sup>15</sup> m<sup>3</sup>, respectively).

## Supplementary Figures

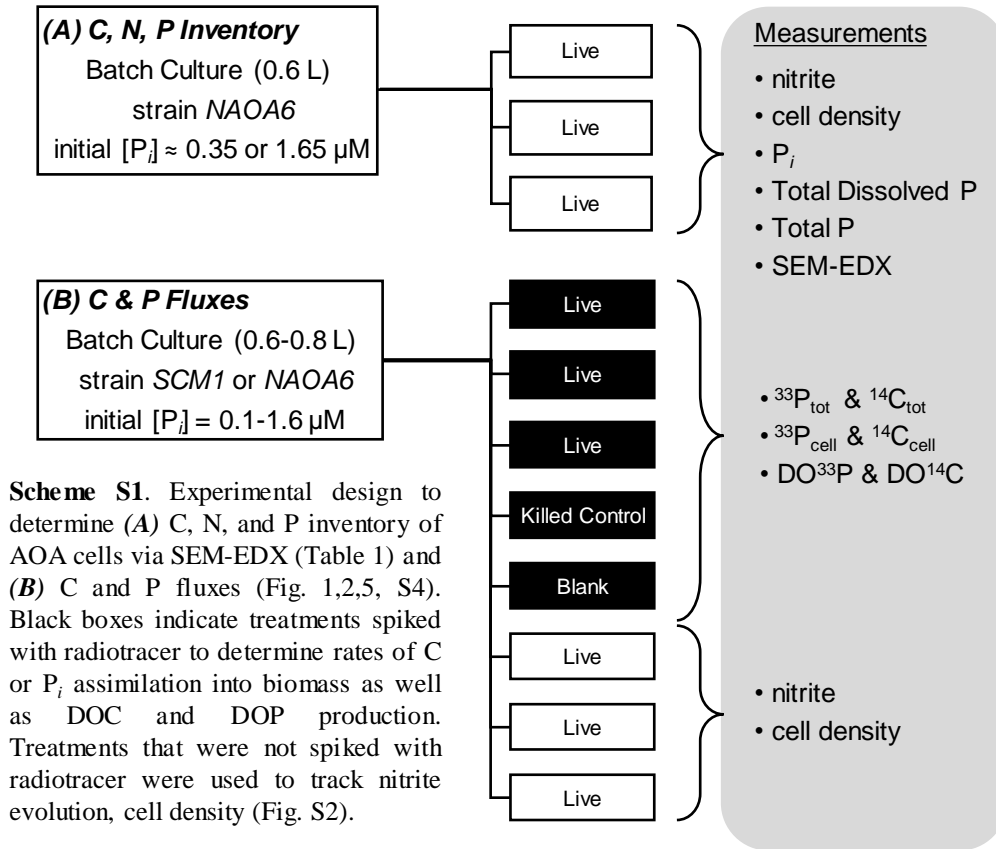

**Scheme S1.** Experimental incubations of *N. maritimus* *NAOA6* and *SCM1* to measure cellular nutrient quotas (A) and rates of C-assimilation, P-uptake, and DOC and DOP release (B).

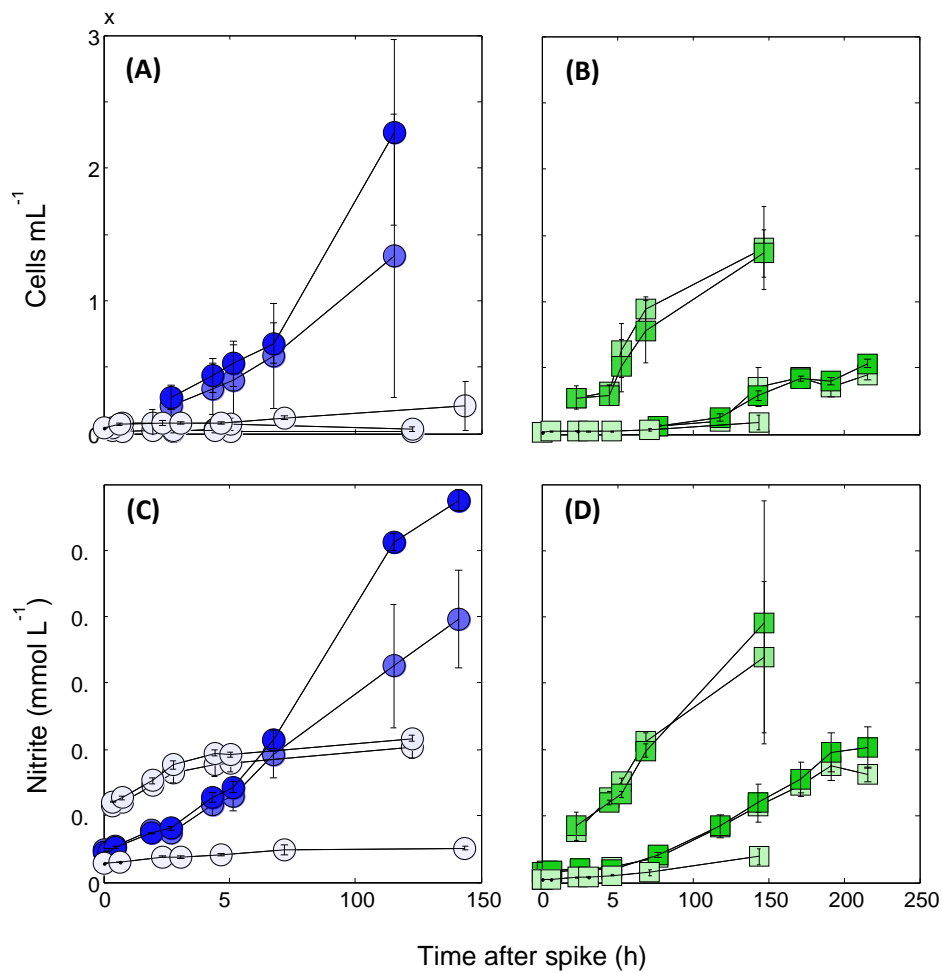

**Figure S1. Growth curves of *N. maritimus* strains NAOA6 (A) and SCM1 (B) during radiotracer experiments at  $0.12 < P_i < 2\mu\text{M}$ .** For EDX and colorimetric analyses, independent batch cultures of NAOA6 were grown in P-deplete (C;  $P_i \approx 0.35 \mu\text{M}$ ) or P-replete SCM medium (D;  $P_i \approx 1.5 \mu\text{M}$ ). The color of the symbols indicates the initial  $P_i$  concentration of the medium (cf. Fig. 1).

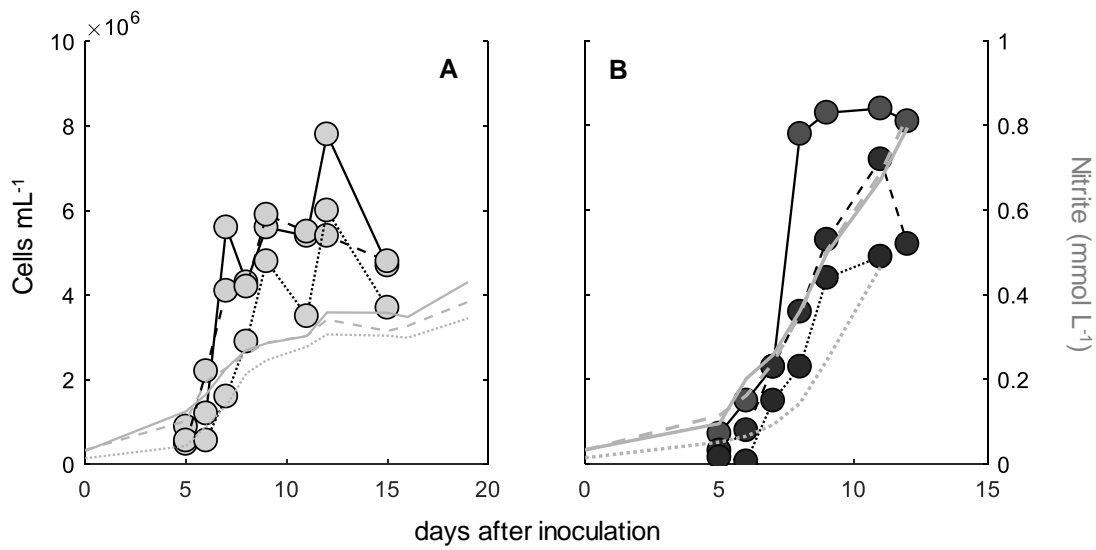

**Figure S2. Growth curves (black lines) and nitrite evolution (grey lines) of replicate *N. maritimus* NAOA6 batch cultures ( $n = 3$ ) grown in P-deplete (A,  $P_i \approx 0.35 \mu\text{M}$ ; grey circles) or P-replete (B,  $P_i \approx 1.6 \mu\text{M}$ ; black circles) SCM medium. Cell material for EDS measurements were collected from the replicates indicated by the solid line.**

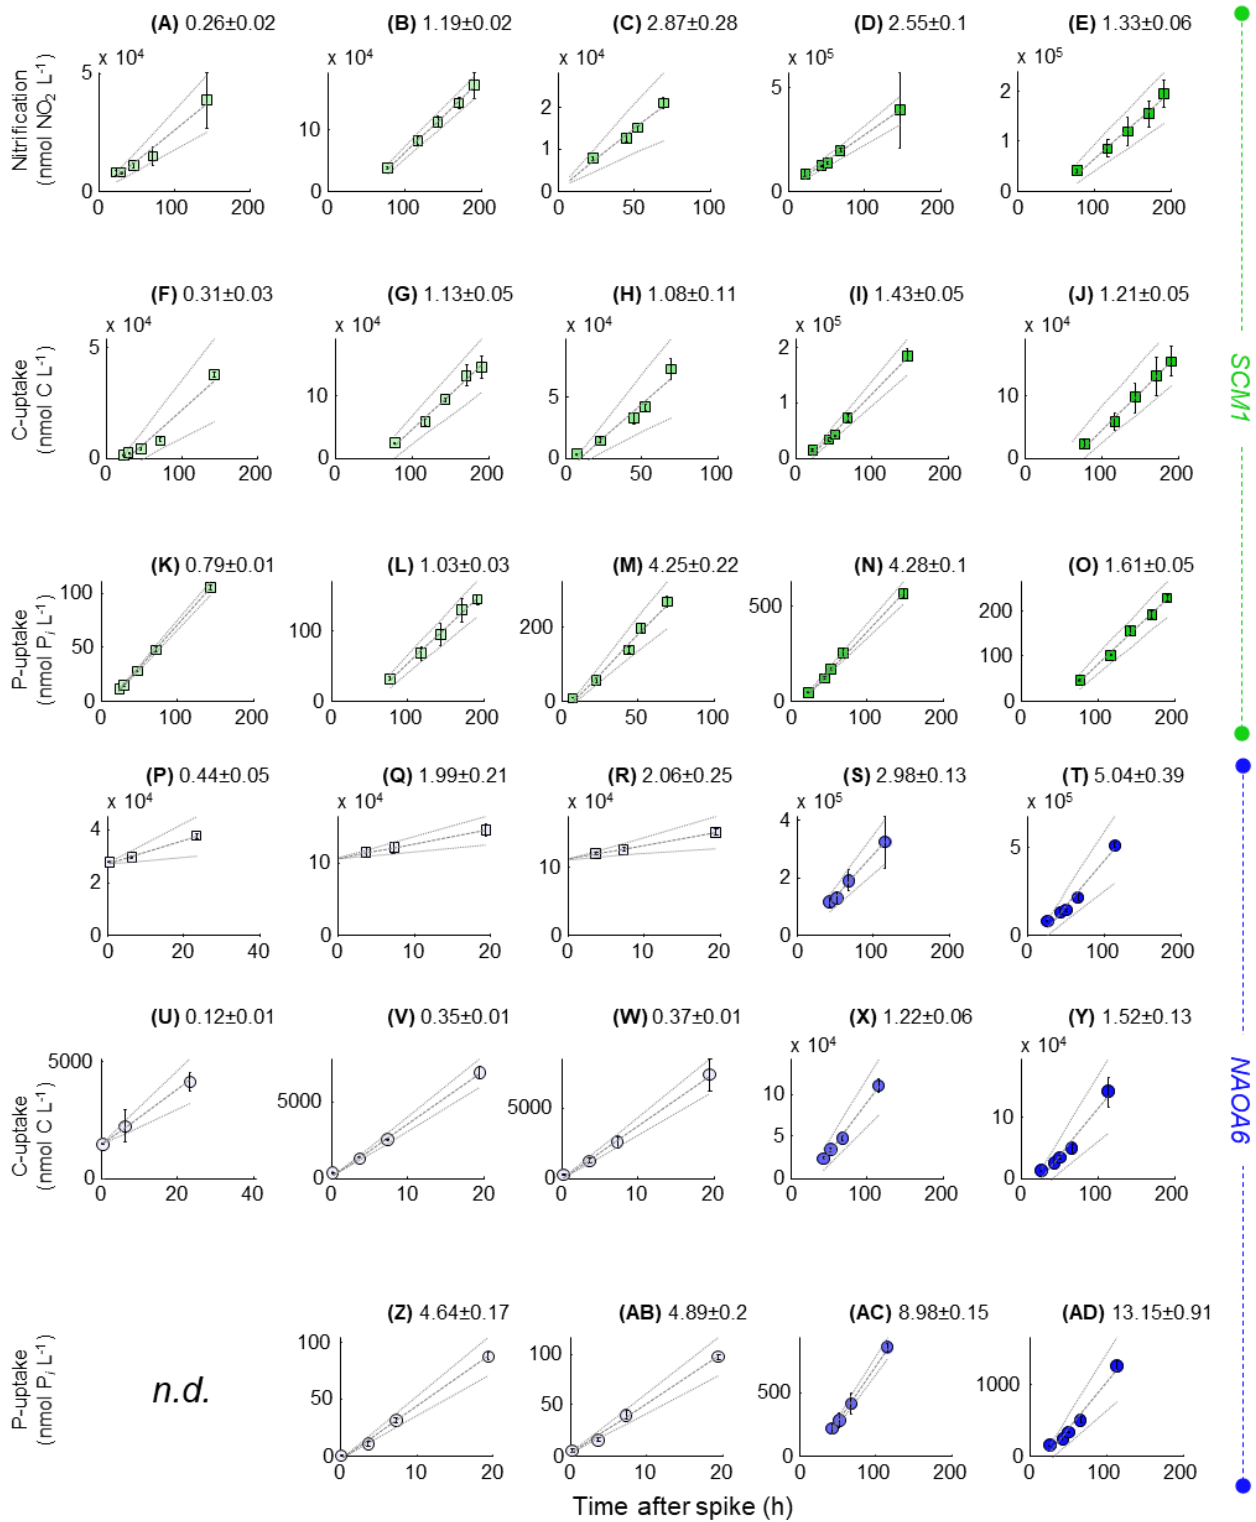

**Figure S3. Linear rates of nitrite production, C-fixation, P-uptake by *N. maritimus* SCM1 (A-O; squares) and NAOA6 (P-AD; circles) in SCM media amended to different  $P_i$  concentrations. Initial  $P_i$  in SCM media increases from left to right (cf. Fig. 1, Table S1). The x-axis in all plots is time (in hours). Error bars represent the standard deviation of three replicate incubations. Dashed lines indicate the confidence interval ( $\alpha = 0.05$ ). The title of each graph is the slope of the line  $\pm$  standard error of the slope, with units of  $\text{nmol L}^{-1} \text{h}^{-1}$  for nitrification, C-fixation, and  $P_i$ -uptake. *n.d.* = no data**

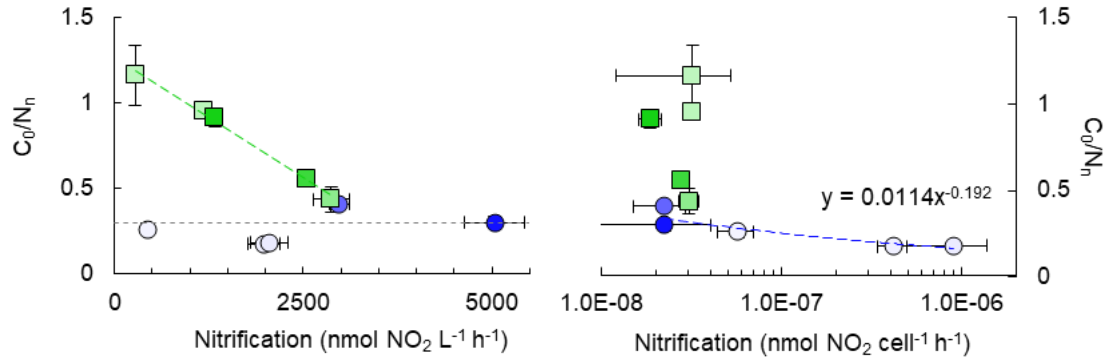

**Fig. S4. Controls of absolute (A) or cell-specific (B) nitrification rates on C yield ( $C_0/N_n$ ) by *N. maritimus* strains *SCM1* (green) and *NAOA6* (blue).**  $P_i$  amendment of the growth medium is indicated by the shade of the symbol as defined in Fig. 1. Error bars indicate propagated error of the 95% confidence interval of the slopes of linear rates of radiotracer incorporation or nitrite production over 3-5 time points among triplicate incubations ( $N = 9-15$  for each data point; cf. Fig. S3).

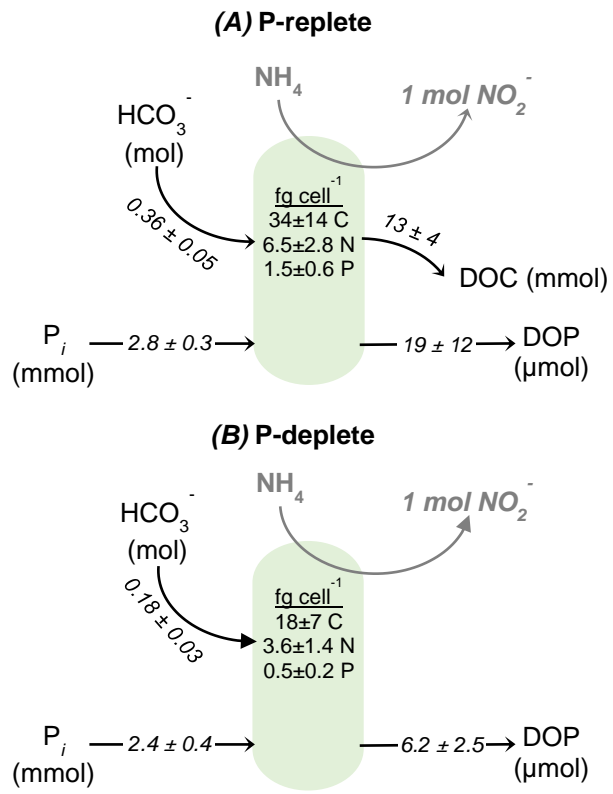

**Fig. S5. Coupled biogeochemical fluxes of *N. maritimus* NAOA6 and physiological responses to P-limitation**



## Supplementary Tables

**Table S1. Linear rates of nitrite production, C-fixation, P-uptake, as well as integrated DOC and DOP release rates by *N. maritimus*.** Rates are reported for strains *NAOA6* and *SCM1* in SCM media amended to different  $P_i$  concentrations (cf. Fig. S3). n.d. = no data

| Strain       | initial $P_i$<br>(nM) | Nitrification<br>(nmol L <sup>-1</sup> h <sup>-1</sup> ) | C-fixation<br>(nmol L <sup>-1</sup> h <sup>-1</sup> ) | $P_i$ uptake<br>(nmol L <sup>-1</sup> h <sup>-1</sup> ) | DOC release<br>(nmol L <sup>-1</sup> h <sup>-1</sup> ) | DOP release<br>(pmol L <sup>-1</sup> h <sup>-1</sup> ) |
|--------------|-----------------------|----------------------------------------------------------|-------------------------------------------------------|---------------------------------------------------------|--------------------------------------------------------|--------------------------------------------------------|
| <i>SCM1</i>  | 910                   | 1327 ± 63                                                | 1212 ± 47                                             | 1.6 ± 0.0                                               | 57 ± 19                                                | 26 ± 4                                                 |
|              | 740                   | 2551 ± 105                                               | 1426 ± 52                                             | 4.3 ± 0.1                                               | 108 ± 6                                                | 33 ± 4                                                 |
|              | 400                   | 2874 ± 239                                               | 1253 ± 180                                            | 4.7 ± 0.3                                               | 130 ± 49                                               | 27 ± 1                                                 |
|              | 190                   | 1191 ± 24                                                | 1135 ± 53                                             | 1.0 ± 0.0                                               | 106 ± 39                                               | 14 ± 0.5                                               |
|              | 160                   | 280 ± 24                                                 | 326 ± 40                                              | 0.8 ± 0.0                                               | <i>nd</i>                                              | 10 ± 5                                                 |
| <i>NAOA6</i> | 1870                  | 5035 ± 393                                               | 1517 ± 126                                            | 13.2 ± 0.9                                              | 47 ± 7                                                 | 53 ± 16                                                |
|              | 1220                  | 2979 ± 131                                               | 1219 ± 57                                             | 9.0 ± 0.2                                               | 49 ± 11                                                | 79 ± 43                                                |
|              | 160                   | 2056 ± 251                                               | 375 ± 12                                              | 4.9 ± 0.2                                               | <i>nd</i>                                              | 12 ± 3                                                 |
|              | 130                   | 1988 ± 212                                               | 349 ± 10                                              | 4.6 ± 0.2                                               | <i>nd</i>                                              | 13 ± 4                                                 |
|              | < 100                 | 442 ± 52                                                 | 116 ± 6                                               | <i>nd<sup>a</sup></i>                                   | <i>nd</i>                                              | <i>nd</i>                                              |

<sup>a</sup> For this incubation, > 10%  $P_i$  was assimilated within 20 min of radiotracer addition, and therefore too quickly to presume the initial  $P_i$  concentration for subsequent calculations

**Table S2. Concentration of P pools in *N. maritimus* NAOA6 batch cultures initiated under P-deplete or P-replete conditions.**

| <i>N. maritimus</i><br>NAOA6<br>experiment | Batch Cultures                                   |                                                |                                                      |                                                  |                      | Cell concentrate                                      |                                          |                                   | fg P cell <sup>-1</sup> <sup>B</sup> |     |
|--------------------------------------------|--------------------------------------------------|------------------------------------------------|------------------------------------------------------|--------------------------------------------------|----------------------|-------------------------------------------------------|------------------------------------------|-----------------------------------|--------------------------------------|-----|
|                                            | initial P <sub>i</sub><br>$\mu\text{mol L}^{-1}$ | final P <sub>i</sub><br>$\mu\text{mol L}^{-1}$ | P <sub>i</sub> assimilated<br>$\mu\text{mol L}^{-1}$ | final DOP <sup>A</sup><br>$\mu\text{mol L}^{-1}$ | P released<br>as DOP | cell density<br>$\times 10^{10}$ cell L <sup>-1</sup> | P <sub>i</sub><br>$\mu\text{mol L}^{-1}$ | total P<br>$\mu\text{mol L}^{-1}$ |                                      |     |
| P-deplete                                  | 1                                                | 0.35                                           | 0.00                                                 | 0.35                                             | 0.025                | 7%                                                    | 1.46                                     | 0.73                              | 1.11                                 | 0.7 |
|                                            | 2                                                | 0.37                                           | 0.00                                                 | 0.37                                             | 0.012                | 3%                                                    | 2.91                                     | 0.40                              | 0.74                                 | 0.4 |
|                                            | 3                                                | 0.35                                           | 0.00                                                 | 0.35                                             | 0.011                | 3%                                                    | 2.30                                     | 0.34                              | 0.72                                 | 0.5 |
| P-replete                                  | 1                                                | 1.39                                           | 0.19                                                 | 1.20                                             | 0.023                | 2%                                                    | 16.1                                     | 3.03                              | 14.24                                | 2.2 |
|                                            | 2                                                | 1.65                                           | 0.48                                                 | 1.17                                             | 0.040                | 3%                                                    | 22.5                                     | 3.73                              | 14.41                                | 1.5 |
|                                            | 3                                                | 1.69                                           | 0.73                                                 | 0.97                                             | 0.029                | 3%                                                    | 17.7                                     | 2.72                              | 8.03                                 | 0.9 |

<sup>A</sup> DOP = TDP - P<sub>i</sub> - blank; where blank is the value of DOP in sterile medium (0.07  $\mu\text{M}$ )

<sup>B</sup> fg P cell<sup>-1</sup> = total P of the cell concentrate minus final DOP of the batch culture, normalized by cell density.

**Table S3. DO<sup>14</sup>C and DO<sup>33</sup>P release by *N. maritimus* NAOA6 and SCM1 in SCM medium amended with 0.2-2 μm P<sub>i</sub>. n.d. = no data**

| <i>N. maritimus</i><br>strain | Initial P <sub>i</sub><br>(nmol L <sup>-1</sup> ) | min t <sub>PO4</sub><br>(h) | Fixed C<br>released as<br>DOC (%) | Final [DOC]<br>(nmol C L <sup>-1</sup> ) | DOC release rate                     |                                         | Assimilated P<br>released as DOP<br>(%) | Final [DOP]               |                                        | Release rate                              |  |
|-------------------------------|---------------------------------------------------|-----------------------------|-----------------------------------|------------------------------------------|--------------------------------------|-----------------------------------------|-----------------------------------------|---------------------------|----------------------------------------|-------------------------------------------|--|
|                               |                                                   |                             |                                   |                                          | pmol L <sup>-1</sup> h <sup>-1</sup> | amol cell <sup>-1</sup> d <sup>-1</sup> |                                         | (nmol P L <sup>-1</sup> ) | pmol P L <sup>-1</sup> h <sup>-1</sup> | zmol P cell <sup>-1</sup> d <sup>-1</sup> |  |
| NAOA6                         | n.d.                                              | 3                           | n.d.                              | n.d.                                     | n.d.                                 | n.d.                                    | 1.0 ± 0.5                               | n.d.                      | n.d.                                   | n.d.                                      |  |
|                               | 127                                               | 16                          | n.d.                              | n.d.                                     | n.d.                                 | n.d.                                    | 1.8 ± 0.5                               | 1.6 ± 0.4                 | 13 ± 4                                 | 81 ± 30                                   |  |
|                               | 159                                               | 21                          | n.d.                              | n.d.                                     | n.d.                                 | n.d.                                    | 1.3 ± 0.3                               | 1.4 ± 0.4                 | 12 ± 3                                 | 28 ± 8                                    |  |
|                               | 1221                                              | 82                          | 5.7 ± 1.3                         | 7 ± 2                                    | 49 ± 11                              | 9 ± 3                                   | 1.2 ± 0.7                               | 11.1 ± 6.0                | 79 ± 43                                | 14 ± 8                                    |  |
|                               | 1869                                              | 83                          | 4.7 ± 1.4                         | 7 ± 1                                    | 47 ± 7                               | 5 ± 2                                   | 0.5 ± 0.2                               | 7.5 ± 2.3                 | 53 ± 16                                | 6 ± 2                                     |  |
| SCM1                          | 179                                               | 159                         | n.d.                              | n.d.                                     | n.d.                                 | n.d.                                    | 1.5 ± 0.8                               | 1.6 ± 0.8                 | 11 ± 6                                 | 27 ± 15                                   |  |
|                               | 187                                               | 125                         | 15.9 ± 5.9                        | 23 ± 8                                   | 106 ± 39                             | 55 ± 21                                 | 2.1 ± 0.2                               | 3.1 ± 0.1                 | 14 ± 0                                 | 7 ± 1                                     |  |
|                               | 388                                               | 59                          | 18.8 ± 7.2                        | 19 ± 7                                   | 130 ± 49                             | 22 ± 10                                 | 1.4 ± 0.1                               | 4.0 ± 0.2                 | 27 ± 1                                 | 5 ± 1                                     |  |
|                               | 744                                               | 100                         | 8.6 ± 0.8                         | 16 ± 1                                   | 108 ± 6                              | 19 ± 3                                  | 0.8 ± 0.1                               | 4.8 ± 0.6                 | 33 ± 4                                 | 6 ± 1                                     |  |
|                               | 910                                               | 661                         | 9.3 ± 3.6                         | 12 ± 4                                   | 57 ± 19                              | 26 ± 9                                  | 2.5 ± 0.2                               | 5.6 ± 0.8                 | 26 ± 4                                 | 12 ± 2                                    |  |
